# Supplementary material for: Dinuclear and layered copper 2-pyridylphosphonates with weak ferromagnetism observed in layer compound Cu(C5H4NPO3)
Source: Royal Society of Chemistry journal article supplement (doi:10.1039/b517311f), 2006-01-01
Supplement: b517311f.pdf [file b517311f.pdf]

## Dinuclear and layered copper 2-pyridylphosphonates with weak ferromagnetism observed in layer compound $\text{Cu}(\text{C}_5\text{H}_4\text{NPO}_3)$ .

Yun-Sheng Ma,<sup>a</sup> You Song,<sup>a</sup> Wen-Xin Du,<sup>b</sup> Yi-Zhi Li,<sup>a</sup> Li-Min Zheng<sup>a,b\*</sup>

**Fig. S1** Packing diagram of structure **1** along [010] direction.

**Fig. S2** Heat capacity for compound **2**.

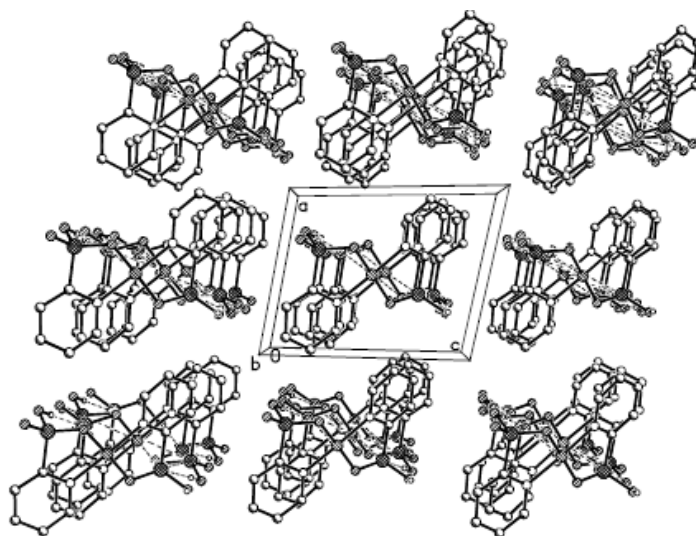

Fig. S1

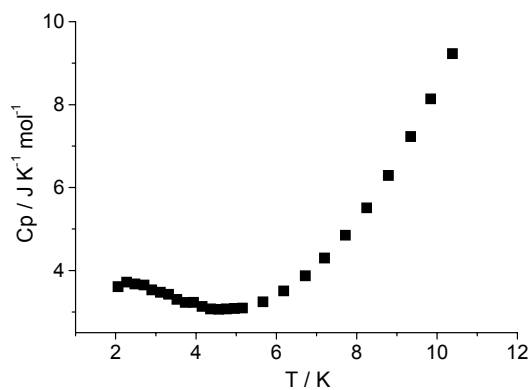

Fig. S2
